# Supplementary material
Source: MDPI journal article supplement (https://www.mdpi.com/1424-8247/16/12/1648)

## Supplementary Information for

# Design, Synthesis, Molecular Modelling and Biological Evaluation of Novel Pyrazole Benzimidazolone Derivatives as Potent Antioxidants

Mohamed Adardour,<sup>1,\*</sup> Marouane Ait Lahcen,<sup>1</sup> Mehdi Oubahmane,<sup>1</sup> Walid Ettahiri,<sup>1,2</sup>  
Ismail Hdoufane,<sup>1</sup> Hafida Bouamama,<sup>3</sup> Mohammed M. Alanazi,<sup>4</sup> Driss Cherqaoui,<sup>1,5</sup>  
Mustapha Taleb,<sup>2</sup> Elena Zaballos Garcia,<sup>6</sup> and Abdesselam Baouid<sup>1</sup>

<sup>1</sup> Molecular Chemistry Laboratory, Department of Chemistry, Semailia Faculty of Sciences, 2390, Cadi Ayyad University, Marrakech 40001, Morocco; m.aitlahcen.ced@uca.ac.ma (M.A.L.); mehdi.oubahmane@ced.uca.ma (M.O.); walid.ettahiri@usmba.ac.ma (W.E.); i.hdoufane@uca.ac.ma (I.H.); cherqaoui@uca.ac.ma (D.C.); baouid@uca.ac.ma (A.B.)

<sup>2</sup> Laboratory of Engineering, Electrochemistry, Modeling and Environment, Faculty of Sciences, Sidi Mohamed Ben Abdellah University, Fez 30000, Morocco; mustaphataleb62@yahoo.fr

<sup>3</sup> Laboratory of Sustainable Development and Health Research, Faculty of Sciences and Techniques, Cadi Ayyad University, Marrakech 40000, Morocco; h.bouamama@uca.ac.ma

<sup>4</sup> Department of Pharmaceutical Chemistry, College of Pharmacy, King Saud University, P.O. Box 2457, Riyadh 11451, Saudi Arabia; mmalanazi@ksu.edu.sa

<sup>5</sup> Sustainable Materials Research Center (SUSMAT-RC), University of Mohammed VI Polytechnic, Benguerir 43150, Morocco

<sup>6</sup> Department of Organic Chemistry, Faculty of Pharmacy, University of Valencia, Ave. Vte. Andres Estelles s/n, 46100 Valencia, Spain; elena.zaballos@uv.es

\* Correspondence: mohamed.adardour@ced.uca.ac.ma

## NMR and HRMS spectra for synthesis pyrazole

### <sup>1</sup>H NMR of Compound 5a

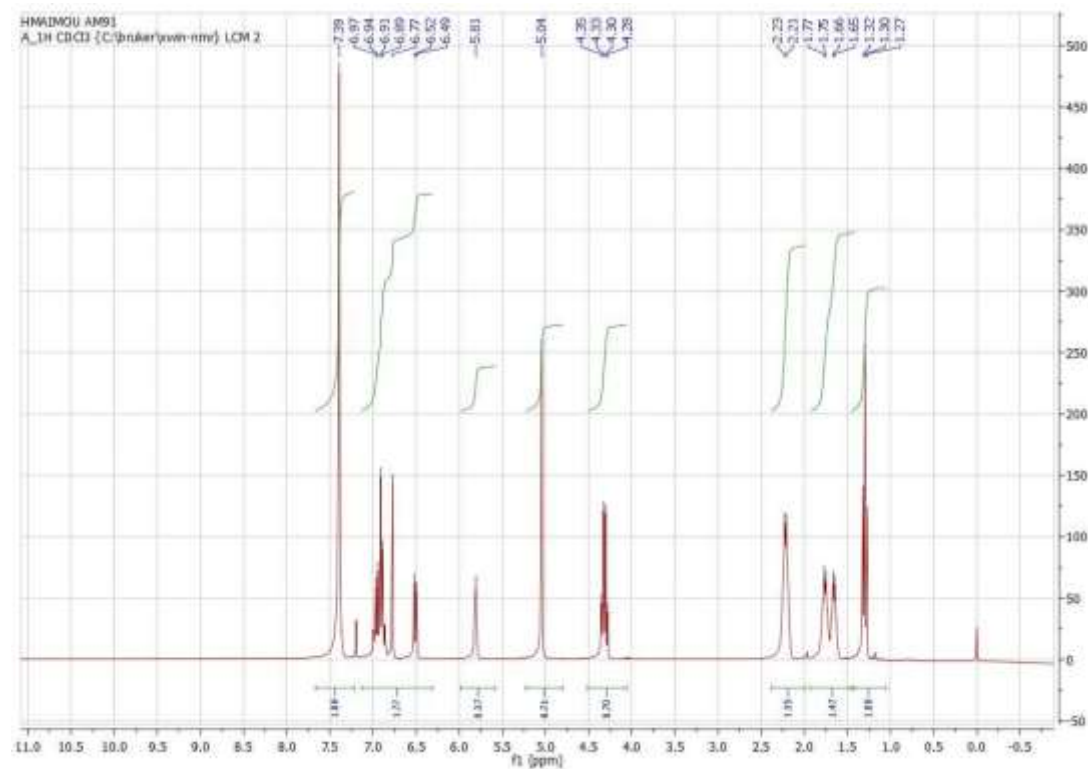

### <sup>13</sup>C NMR of Compound 5a

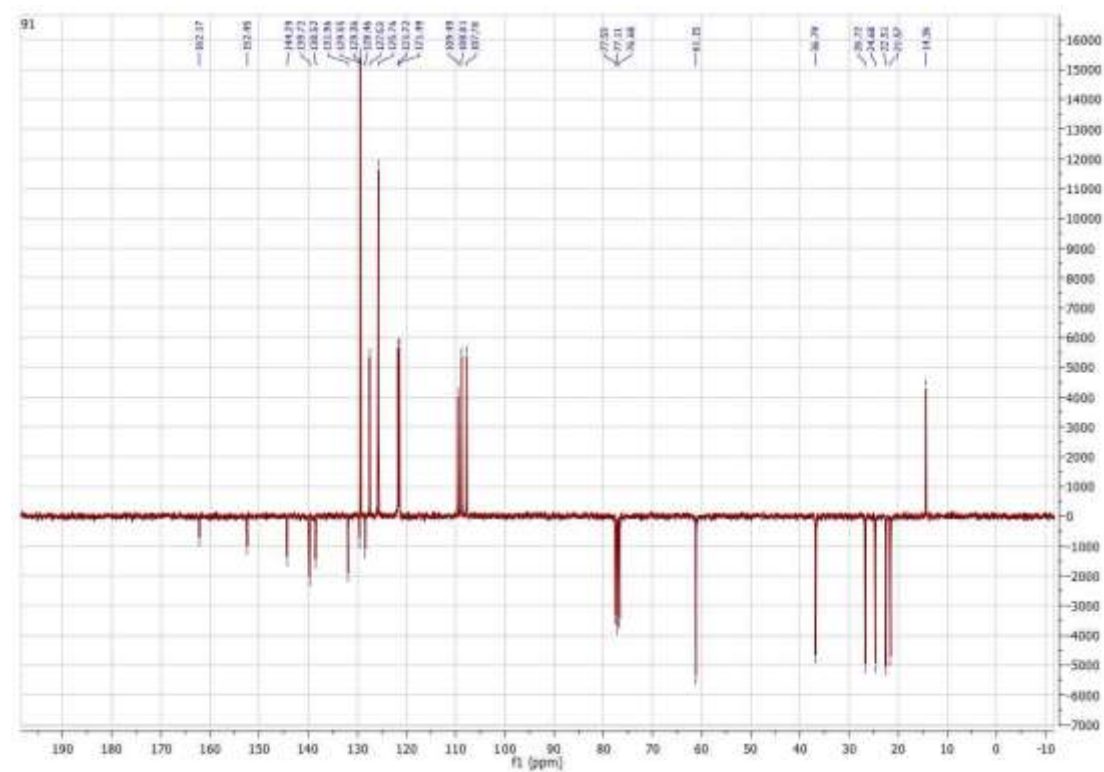

### <sup>1</sup>H NMR of Compound 5b

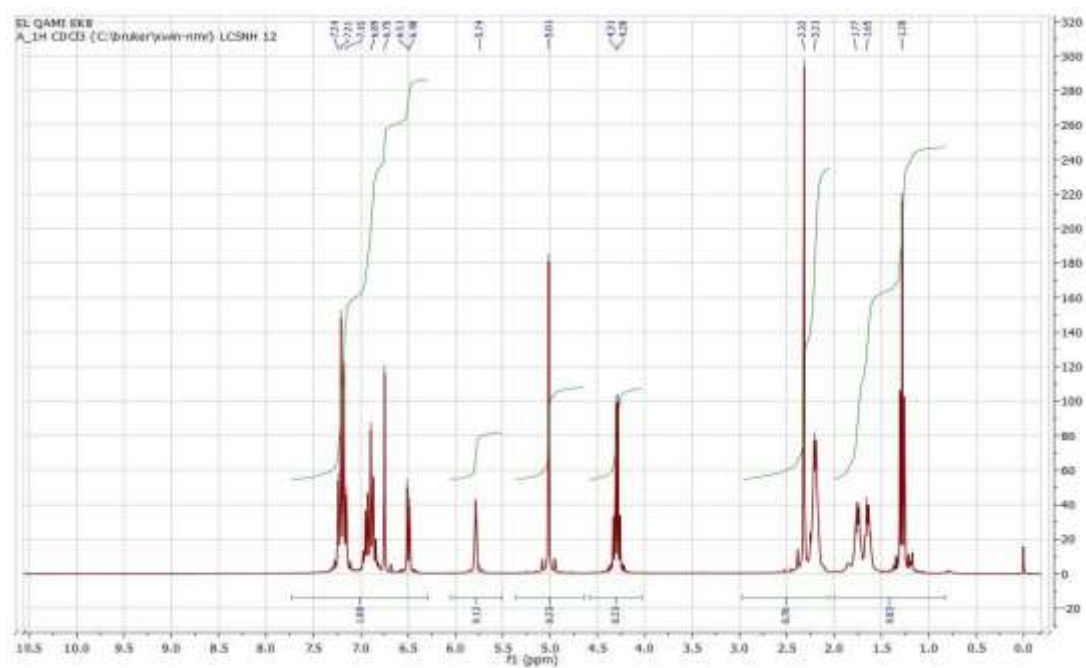

### <sup>13</sup>C NMR of Compound 5b

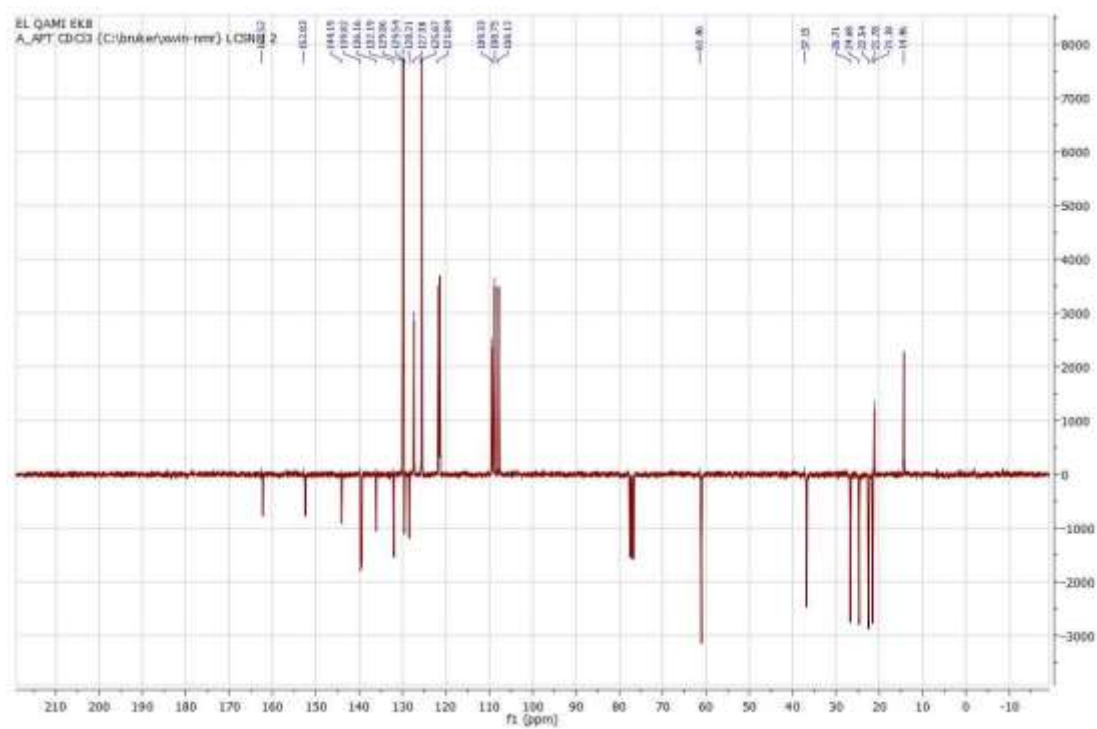

### HRMS of Compound 5b

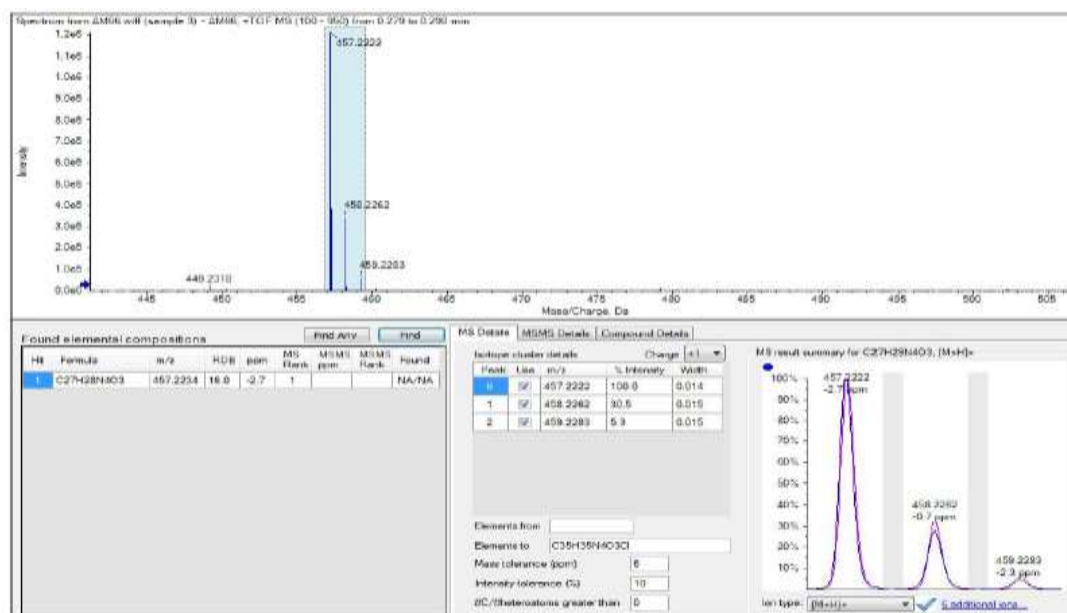

## <sup>1</sup>H NMR of Compound 5c

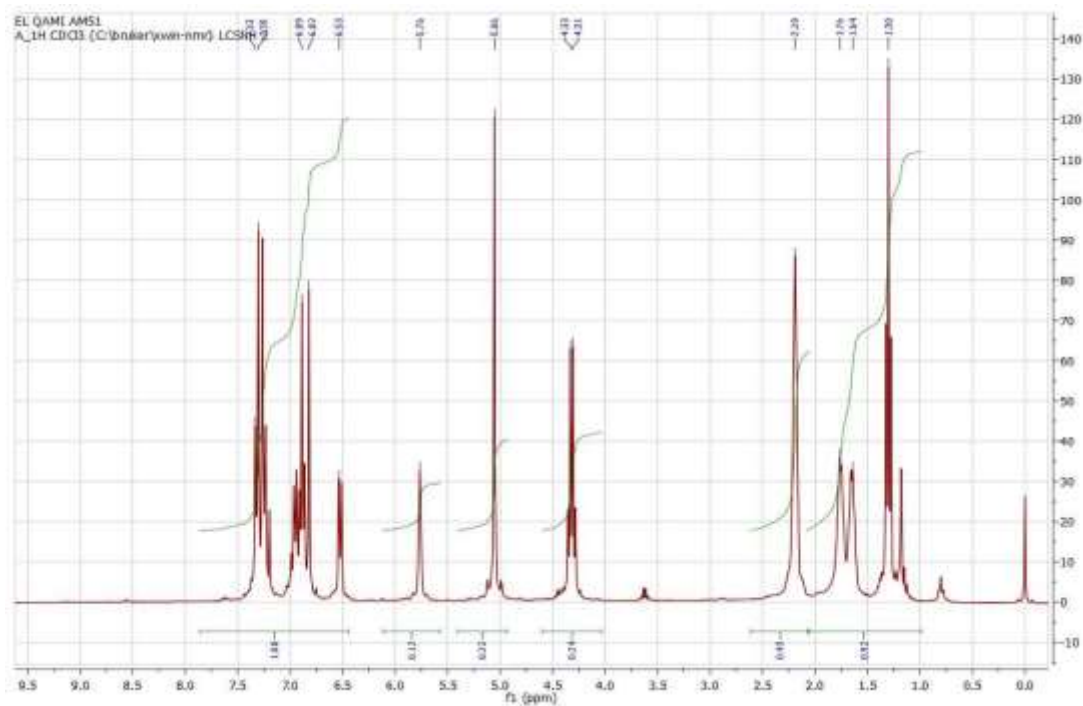

## <sup>13</sup>C NMR of Compound 5c

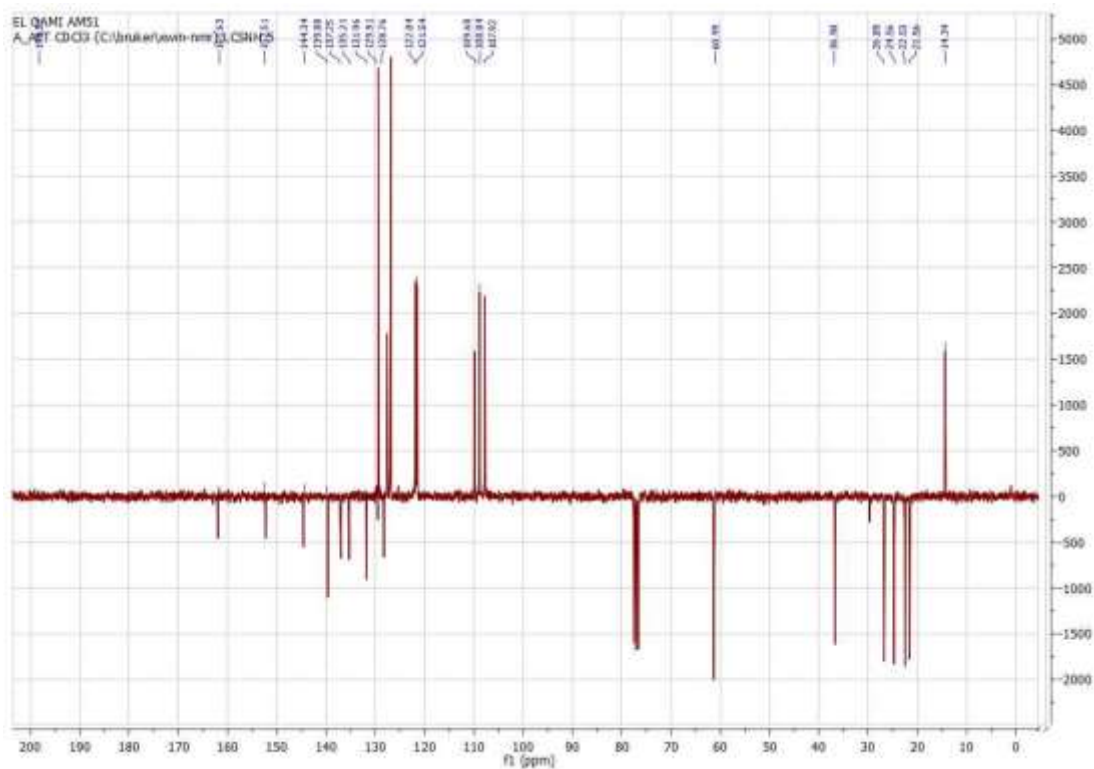

## HRMS of Compound 5c

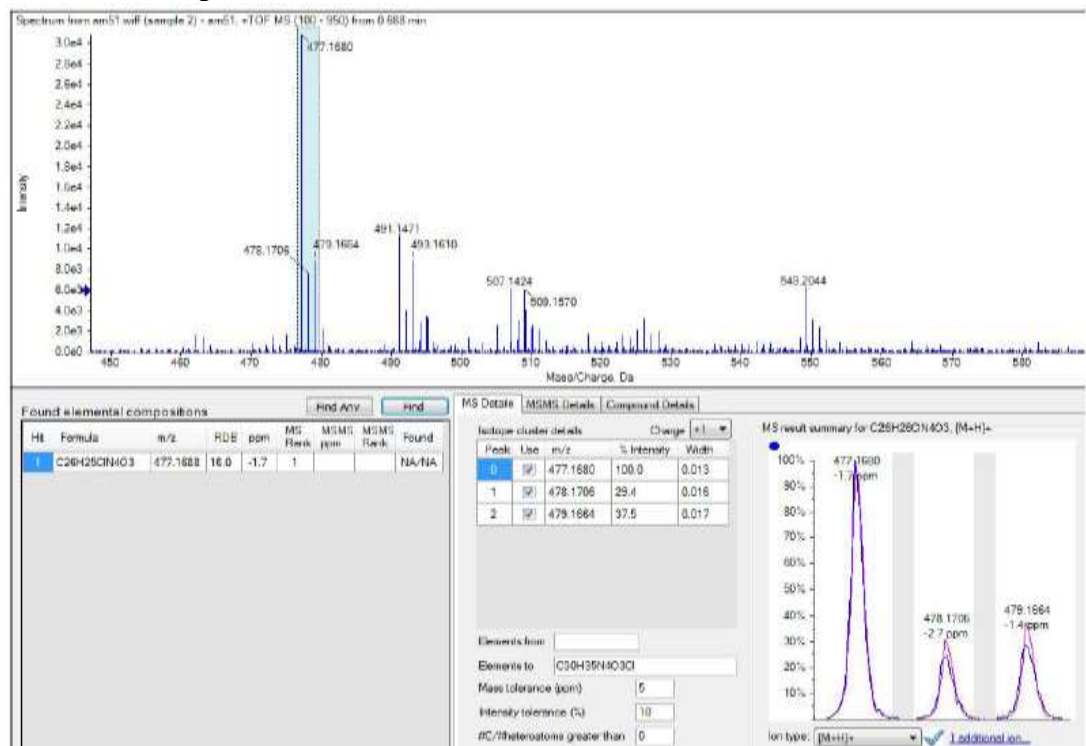

## <sup>1</sup>H NMR of Compound 6a

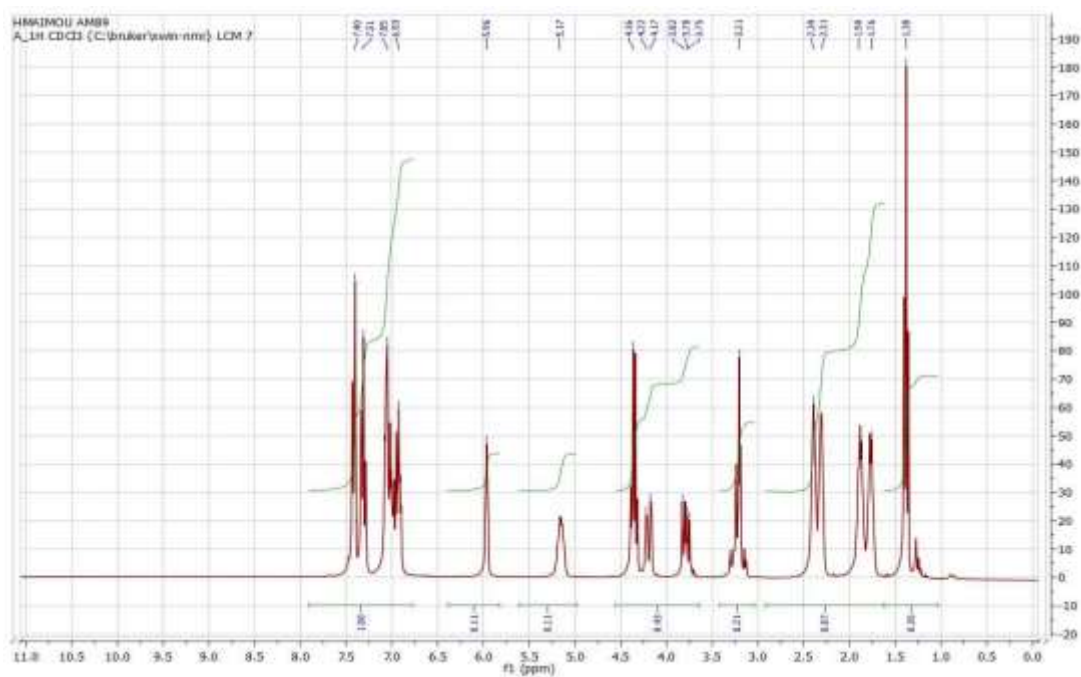

**$^{13}\text{C}$  NMR of Compound 6a**

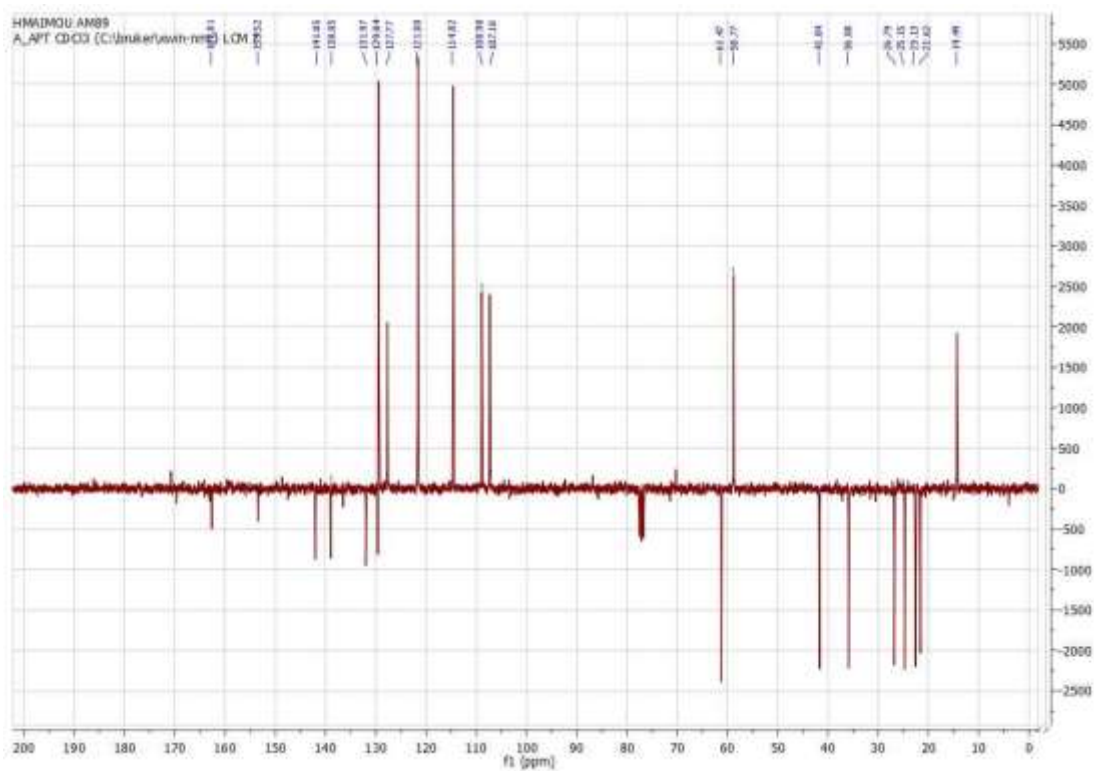

**$^1\text{H}$  NMR of Compound 6b**

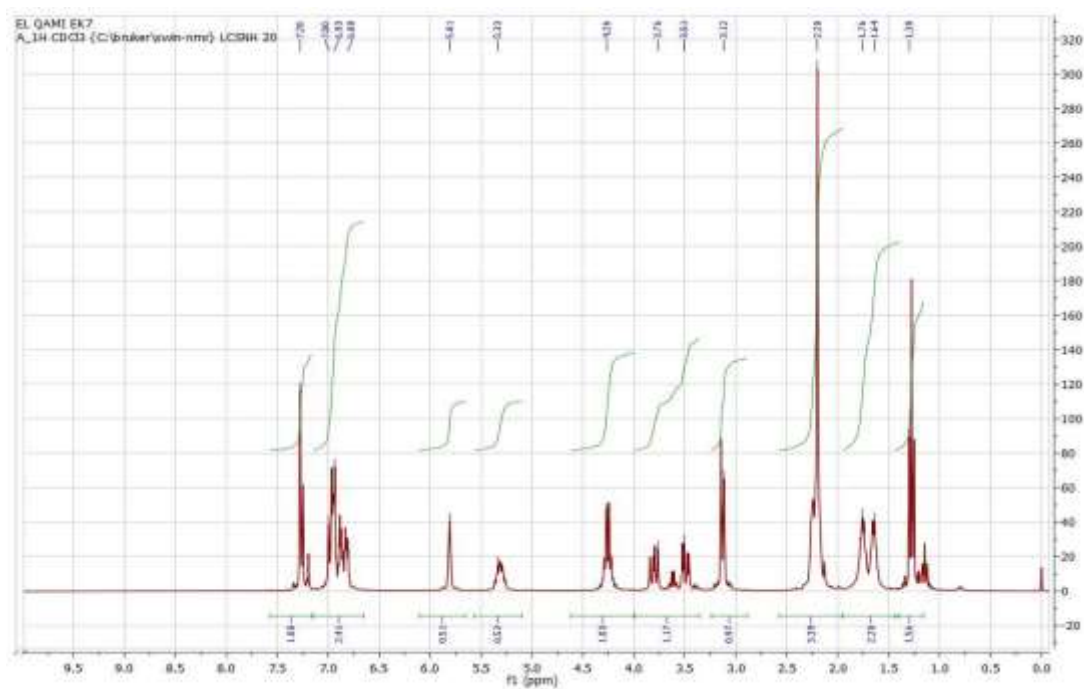

**$^{13}\text{C}$  NMR of Compound 6b**

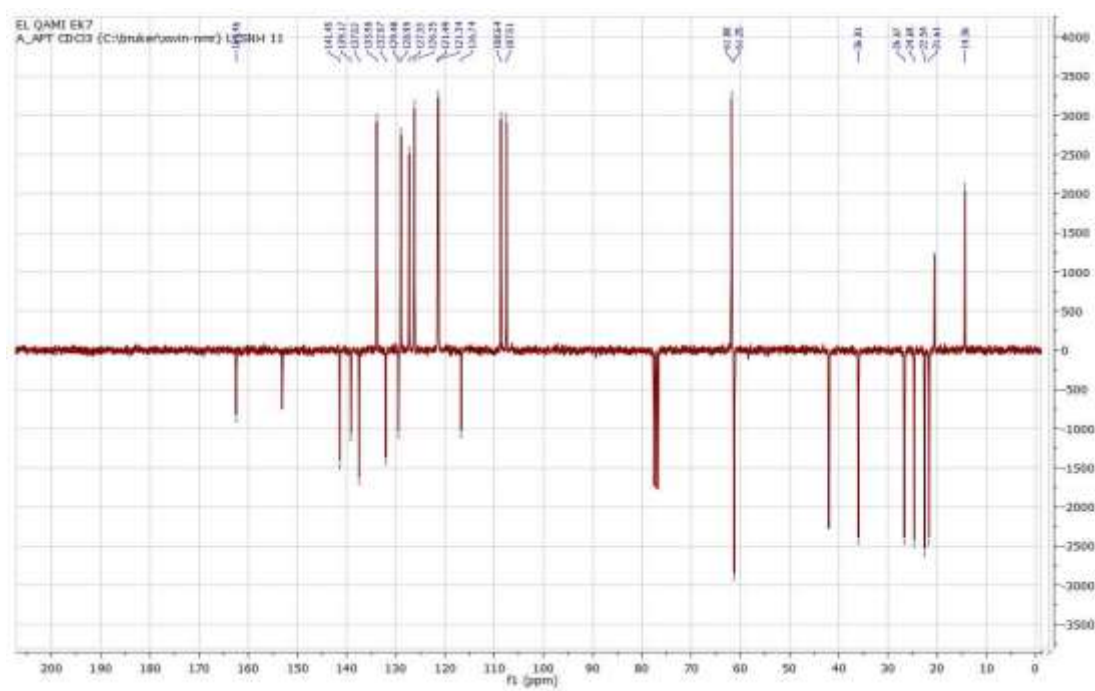

**$^1\text{H}$  NMR of Compound 6c**



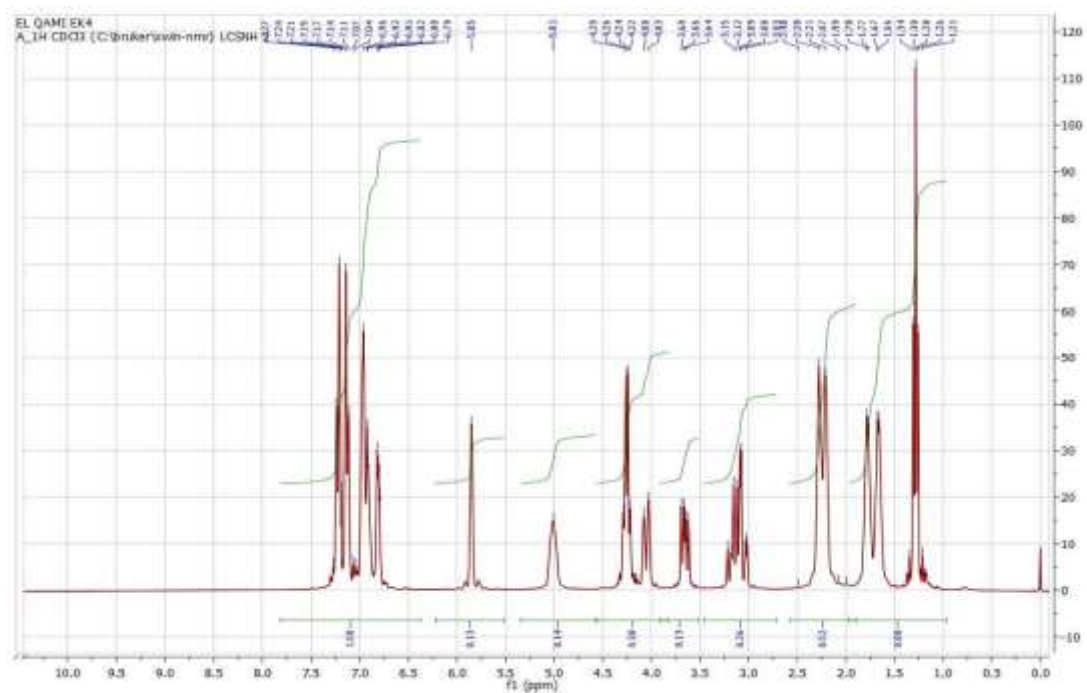

### <sup>13</sup>C NMR of Compound 6c

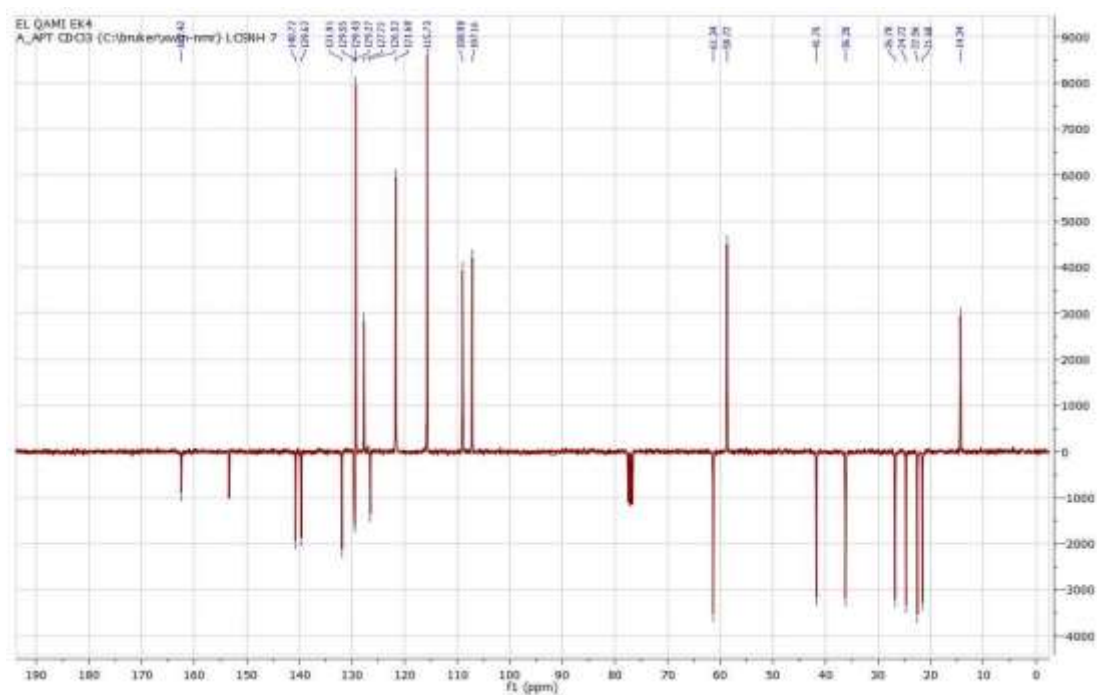

Supplement: s1 [file s1]
